# Supplementary material for: Noncoding RNAs-mediated overexpression of KIF14 is associated with tumor immune infiltration and unfavorable prognosis in lung adenocarcinoma
Source: publisher site journal article supplement (doi:10.18632/aging.204332), 2022-10-11
Supplement: Supplementary file [file aging-v14i19-204332-supplementary-material-SD1.pdf]

**SUPPLEMENTARY FIGURES**

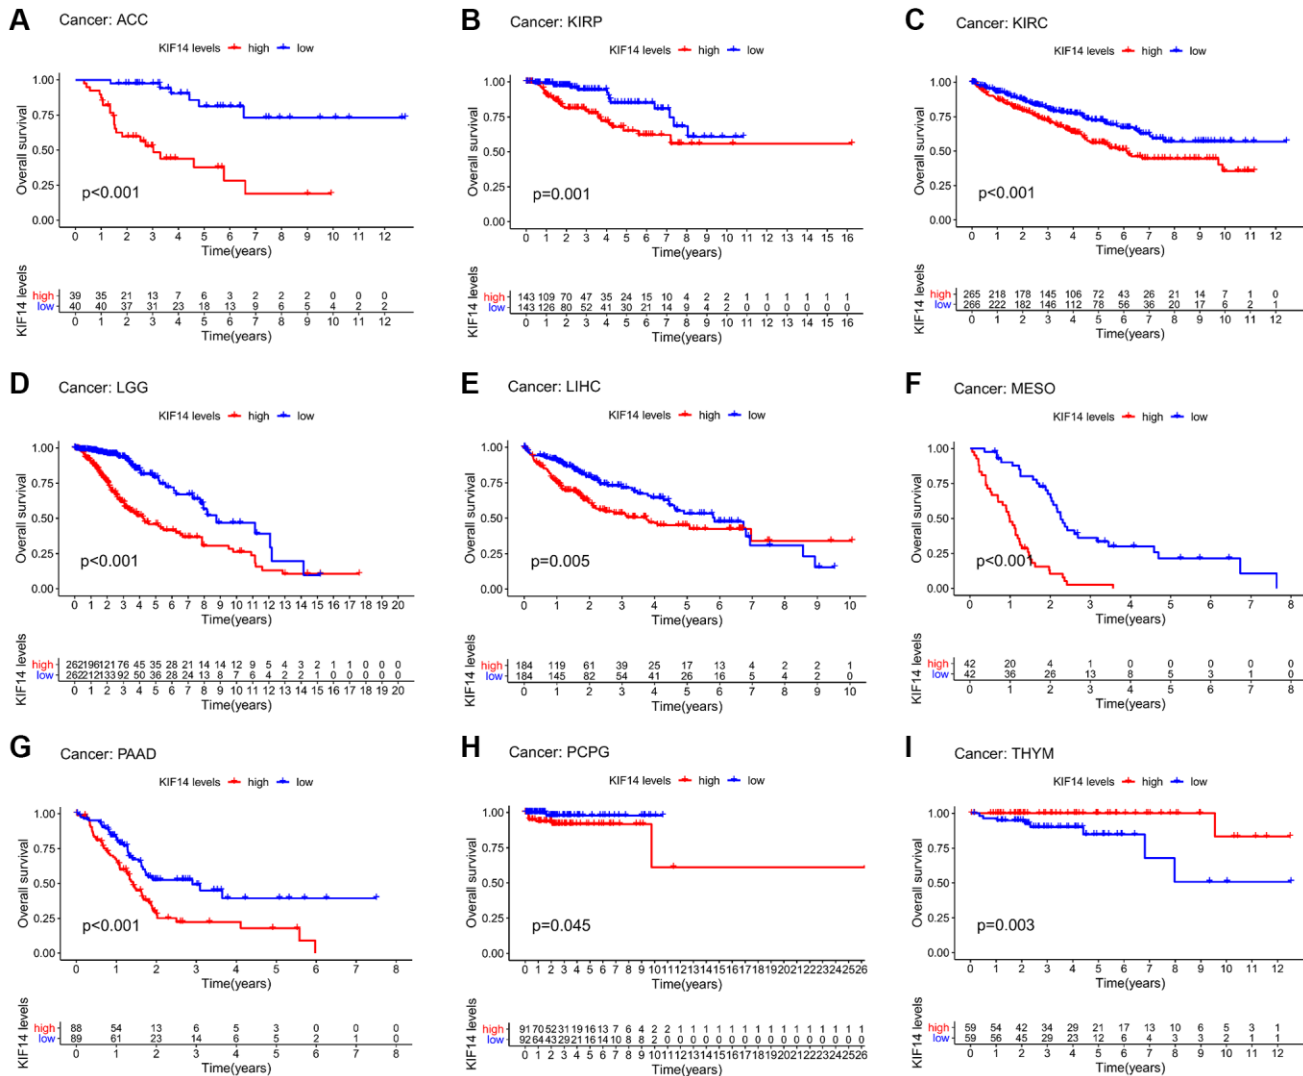

**Supplementary Figure 1. Overall survival analyses of KIF14 in pan-cancer.** K-M method was used for constructing survival curves. (A) Adrenocortical carcinoma (ACC), (B) Kidney renal papillary cell carcinoma (KIRP), (C) Kidney renal clear cell carcinoma (KIRC), (D) Brain Lower Grade Glioma (LGG), (E) Liver hepatocellular carcinoma (LIHC), (F) Mesothelioma (MESO), (G) Pancreatic adenocarcinoma (PAAD), (H) Pheochromocytoma and Paraganglioma (PCPG), (I) Thymoma (THYM).

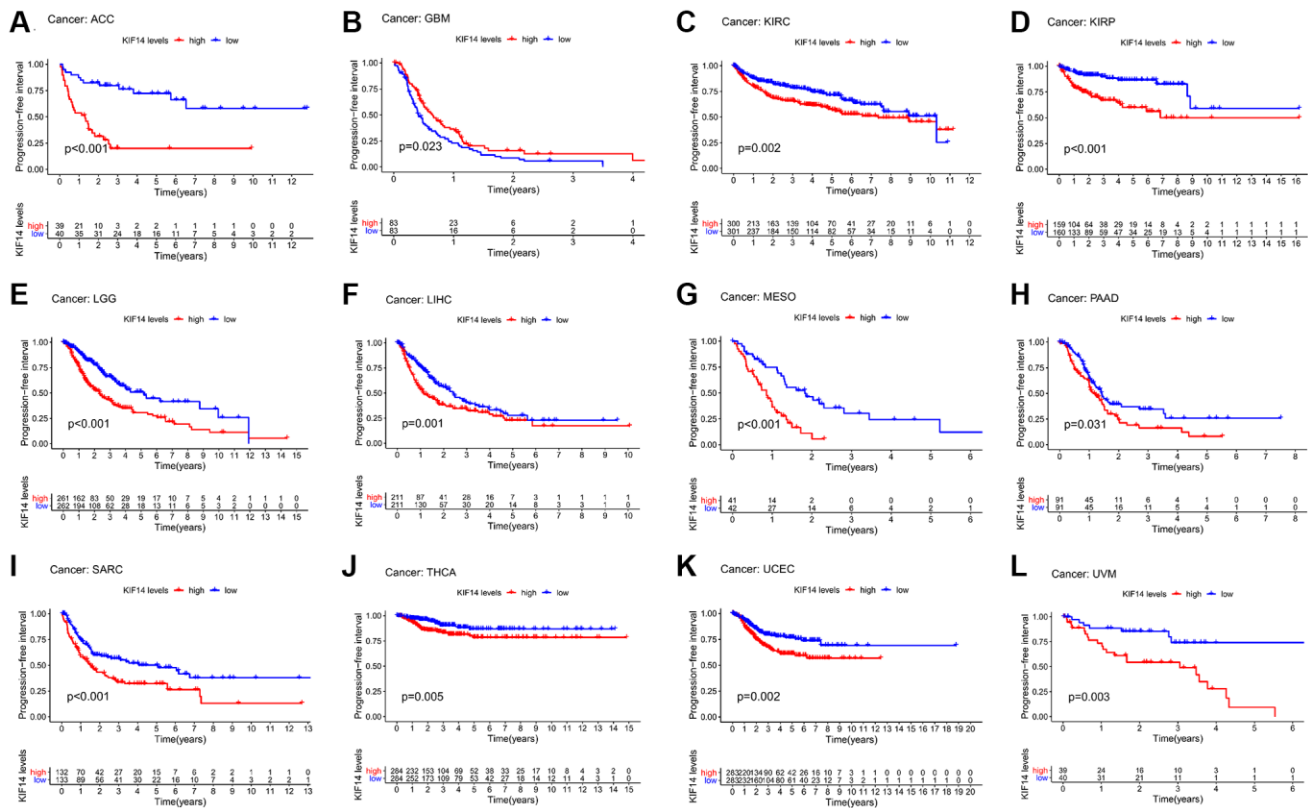

**Supplementary Figure 2. Progression-free survival analyses of KIF14 in pan-cancer.** K-M method was used for constructing survival curves. (A) Adrenocortical carcinoma (ACC), (B) Glioblastoma multiforme (GBM), (C) Kidney renal clear cell carcinoma (KIRC), (D) Kidney renal papillary cell carcinoma (KIRP), (E) Brain Lower Grade Glioma (LGG), (F) Liver hepatocellular carcinoma (LIHC), (G) Mesothelioma (MESO), (H) Pancreatic adenocarcinoma (PAAD), (I) Sarcoma (SARC), (J) Thyroid carcinoma (THCA), (K) Uterine Corpus Endometrial Carcinoma (UCEC), (L) Uveal Melanoma (UVM).

KIF14: 5' guuaacauugguaUACUGUc 3'

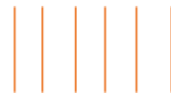

miRNA: 3' aagucauagugucAUGACAu 5'

**Supplementary Figure 3. The binding target sequence between has-miR-101-3p and 3'UTR of KIF14.**

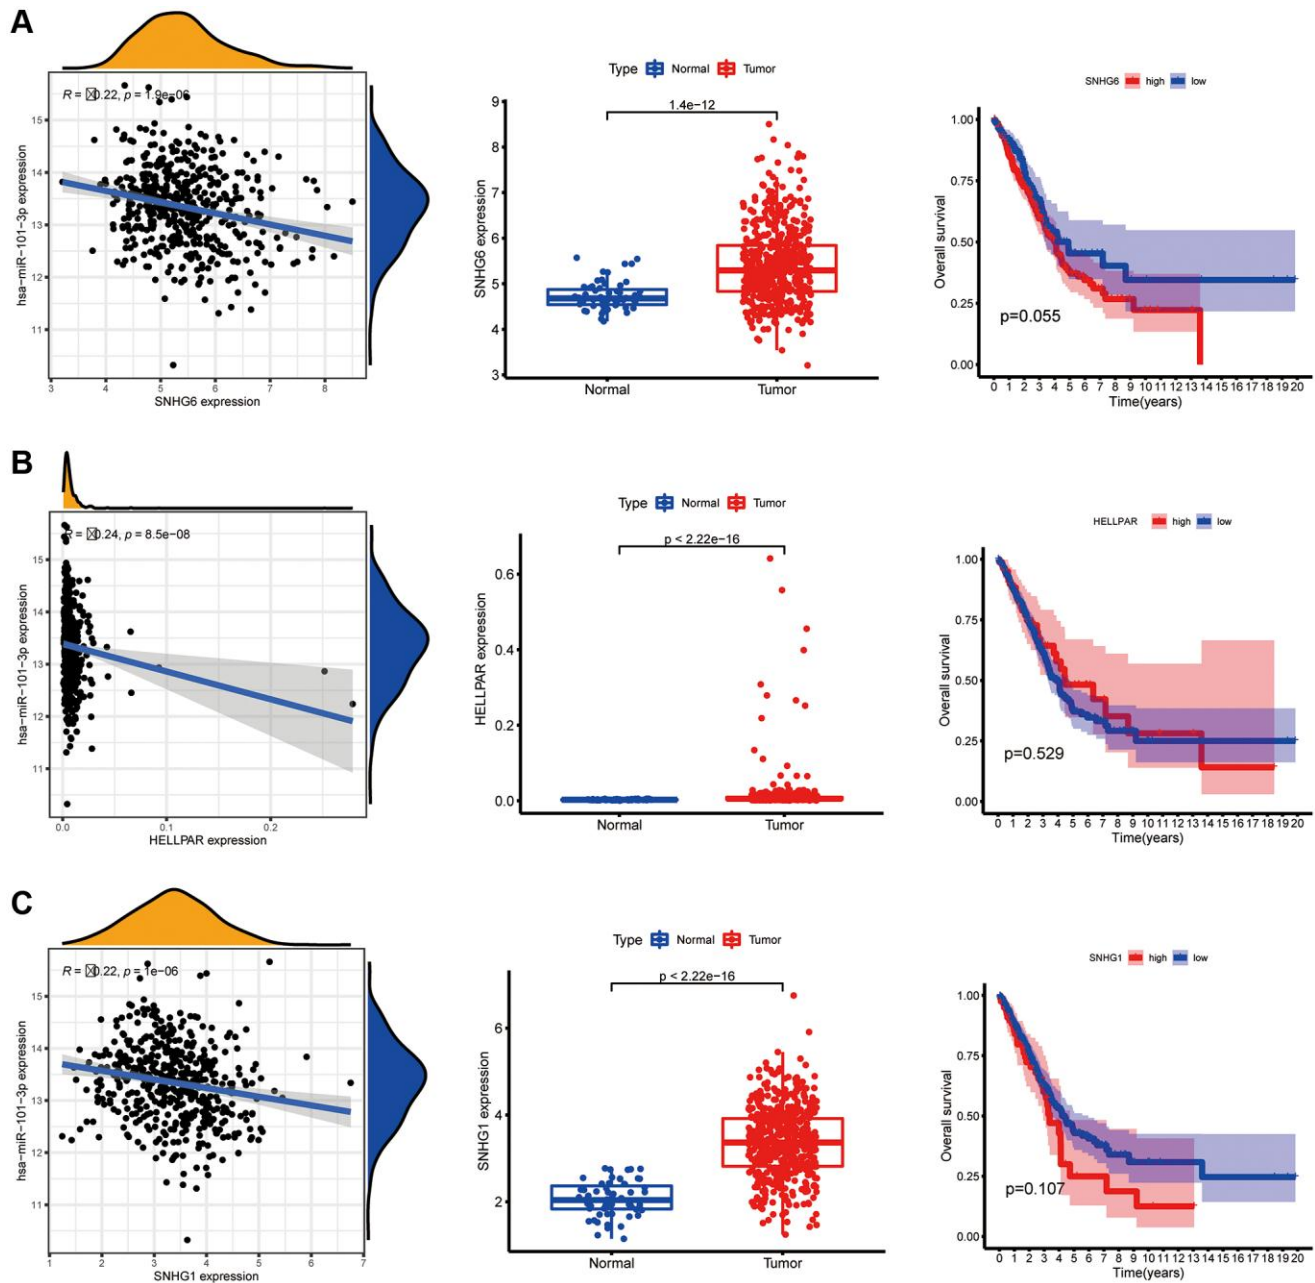

**Supplementary Figure 4. The correlation, expression and survival analysis of predicted lncRNAs in TCGA-LUAD cohort. (A)** The correlation between SNHG6 and KIF14 expression, differential expression and survival analysis of SNHG6 in TCGA-LUAD cohort. **(B)** The correlation between HELLPAR and KIF14 expression, differential expression and survival analysis of SNHG6 in TCGA-LUAD cohort. **(C)** The correlation between SNHG1 and KIF14 expression, differential expression and survival analysis of SNHG6 in TCGA-LUAD cohort.

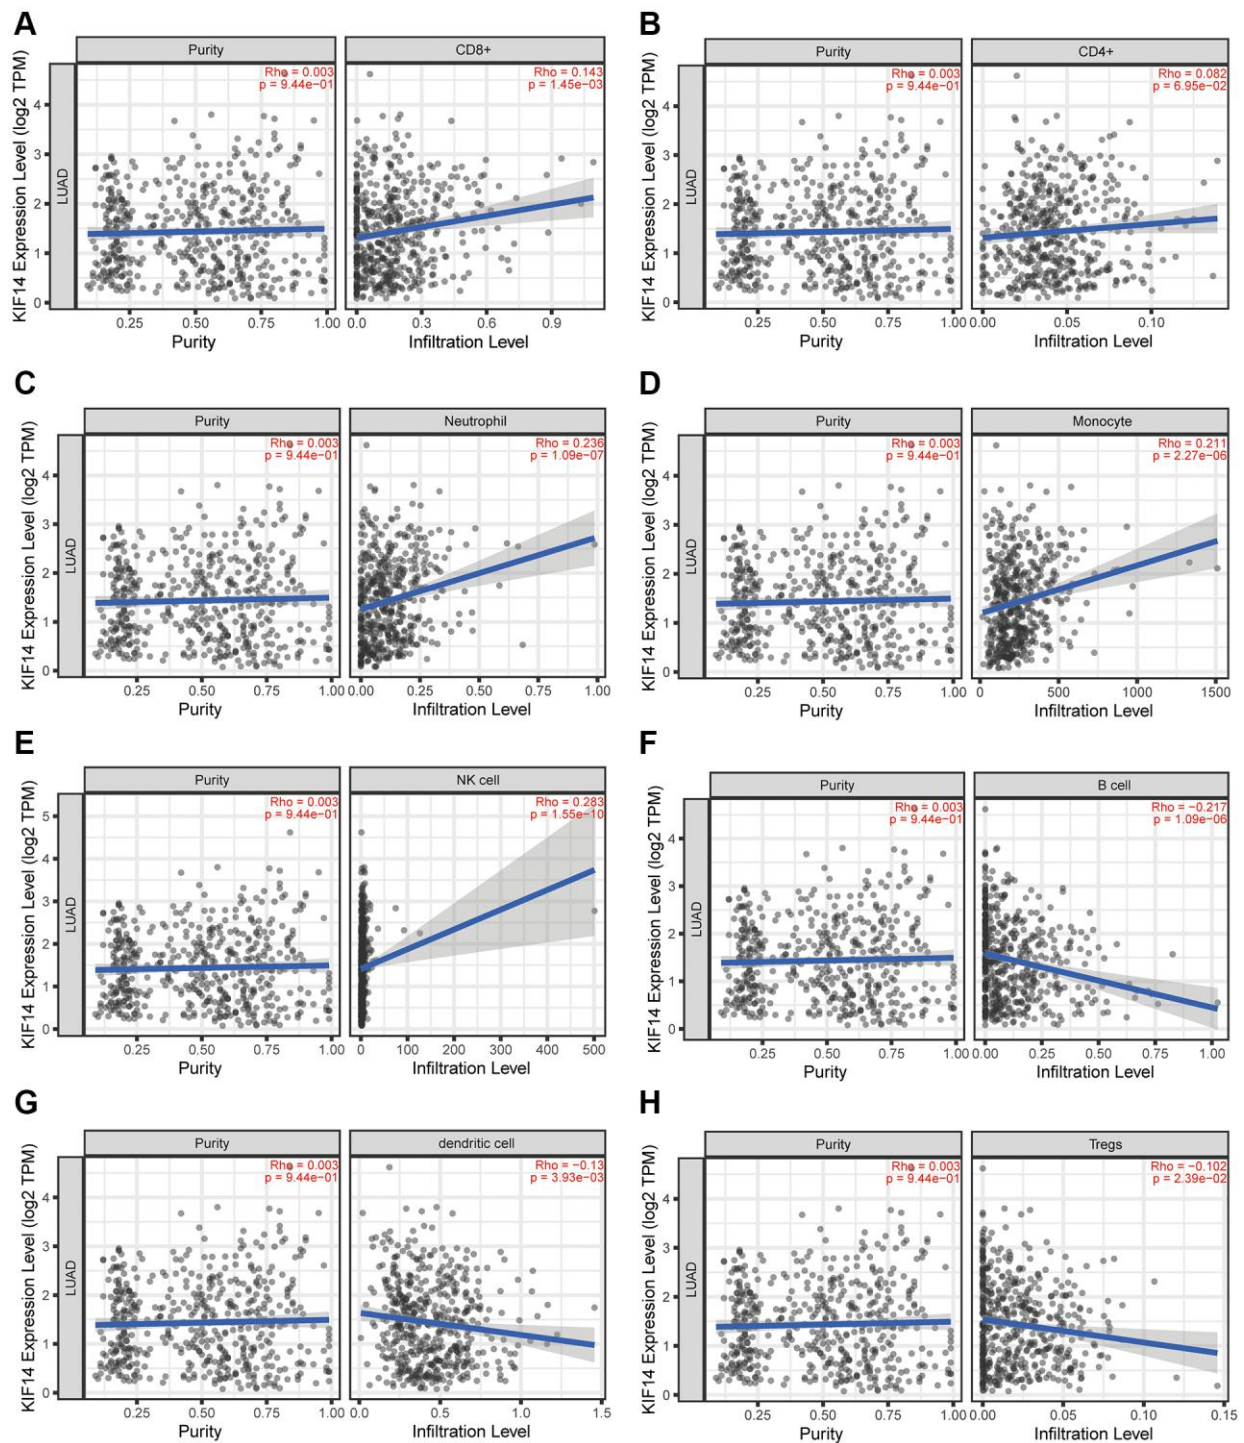

**Supplementary Figure 5. Correlation between KIF14 expression and ICI in LUAD.** KIF expression was positively correlated with CD8<sup>+</sup> T cell (A), CD4<sup>+</sup> T cell (B), neutrophil cell (C), monocyte cell (D) and NK cell (E), while negatively correlated with B cell (F), dendritic cell (G), and Treg cell (H) infiltration in LUAD, which were determined using the TIMER database.
